# Supplementary material
Source: publisher figshare collection journal article supplement (https://acs.figshare.com/ndownloader/files/4625512)
Supplement: Supplementary file 1 [file 4625512]

# In-situ generation of Au nanoparticles in UV-curable refractive index controlled SiO<sub>2</sub>-TiO<sub>2</sub>-PEO hybrid films

Sucheta De, and Goutam De\*

## Supporting Information for Publication

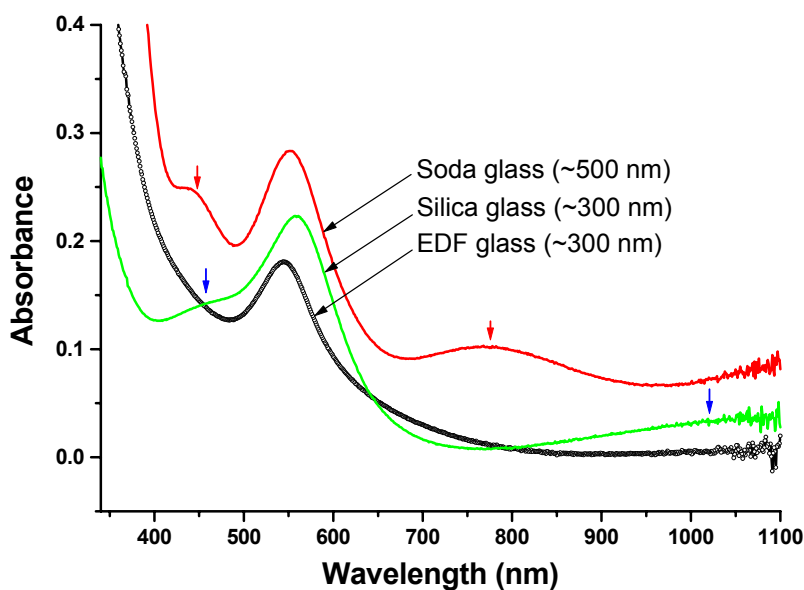

**Figure S1**

A comparative optical absorption spectra of in-situ generated Au nanoparticle embedded SiO<sub>2</sub>-TiO<sub>2</sub>-PEO hybrid film deposited on three different glass substrates. The films were dried at 90 °C and followed by UV-treated with energy=5.3 J/cm<sup>2</sup>. Film thickness (t) values are given in the body of the figure. The refractive index of the film is ~1.68. The peaks shown by arrows are due to optical interference reasons.

[Refractive index of EDF glass = 1.69; Soda-lime-silica glass = 1.51; Silica glass =1.46]
